# Supplementary material
Source: Springer Nature journal article supplement (https://www.springermedizin.de/resource/supplementary/12936_2014_3278_MOESM8_ESM.pdf/9545484)
Supplement: MOESM8 [file 9545484]

*Interpretation  
photographs*

**Selection patients**

**Selection CHWs**

**Index test**

**Reference standard**

**Time bias**

**Missing data**

***n* observations**

Counihan 2012

-

+

+

+

+

+

630, 610 and 590 test results

Harvey 2008

-

-

+

+

+

+

320, 210 and 260 test results
